# Supplementary material for: Increased autoantibodies against incretin indicate poor prognosis in patients with diabetes
Source: Research Square preprint supplement (doi:10.21203/rs.3.rs-6663426/v1), 2025-06-10
Supplement: Supplementary file 1 [file 385f2f15d02049fef659769f.docx]

­­

|  | HD group (N=109) | | DM group (N=274) | |
| --- | --- | --- | --- | --- |
| Age [year] | 58.0 | 5.8 | 63.1 | 12.1 | <0.001 |
| Height [cm] | 163.2 | 9.1 | 162.6 | 9.2 | 0.538 |
| Weight [kg] | 63.5 | 11.9 | 65.5 | 14.3 | 0.184 |
| BMI [kg/m2] | 23.7 | 3.2 | 24.6 | 4.2 | 0.034 |
| LDL-C [mg/dL] | 128.6 | 29.8 | 106.5 | 29.9 | <0.001 |
| TC [mg/dL] | 211.1 | 30.4 | 182.9 | 32.6 | <0.001 |
| TG [mg/dL] | 109.5 | 107.2 | 153.7 | 111.2 | <0.001 |
| HDL-C [mg/dL] | 67.5 | 16.8 | 60.7 | 17.8 | <0.001 |
| nonHDL-C [mg/dL] | 143.6 | 31.7 | 123.4 | 35.0 | <0.001 |
| HbA1c [%] | 5.6 | 0.3 | 6.7 | 1.1 | <0.001 |
| TP [g/dL] | 7.2 | 0.4 | 7.1 | 0.6 | 0.348 |
| Alb [g/dL] | 4.4 | 0.3 | 4.6 | 3.3 | 0.502 |
| AST [U/L] | 23.4 | 9.0 | 26.4 | 14.0 | 0.038 |
| ALT [U/L] | 23.2 | 16.3 | 26.1 | 17.8 | 0.136 |
| γ-GTP [U/L] | 40 | 44.1 | 52.63 | 87.0 | 0.148 |
| ALP [U/L] | 201.9 | 58.9 | 247 | 94.2 | <0.001 |
| LDH [U/L] | 176.1 | 33.6 | 206 | 72.7 | <0.001 |
| UA [mg/dL] | 5.4 | 1.2 | 5.4 | 1.4 | 0.830 |

**Supplemental Table 1.** **Characteristics of patients included in the analysis**

A total of 109 healthy donor (HD) blood samples were collected from the Port Square Kashiwado Clinic. A total of 274 patients with diabetes (DM) were recruited from Chiba University Hospital. Serum samples were collected from patients who had provided informed consents. A distribution of 109 HD serum samples is 59 male and 50 female. A distribution of 274 patients with DM serum samples is 155 male and 119 female, 214 type 2 DM, 28 type 1 DM and 32 unknown. The Mann–Whitney U test was used to determine significant differences between the two groups.

GIP-Ab: glucose-dependent insulinotropic polypeptide antibody, GLP-1-Ab: glucagon-like peptide-1antibody, a.c: Alpha photon counts, BMI: body mass index, LDL-C: low density lipoprotein-cholesterol, TC: total cholesterol, TG: triglyceride, HDL-C: high density lipoprotein-cholesterol, HbA1c: hemoglobin A1c, TP: total protein, Alb: albumin AST: aspartate aminotransferase, ALT: alanine aminotransferase, -GTP: γ-glutamyl transpeptidase, ALP: alkaline phosphatase, LDH: lactate dehydrogenase, UA: uric acid
